# Supplementary material for: Assessment of the readiness of restorations manufactured by CAD/CAM in terms of marginal fit (Part I)
Source: PeerJ. 2022 May 2;10:e13280. doi: 10.7717/peerj.13280 (PMC9070325; doi:10.7717/peerj.13280)
Supplement: Supplemental Information 1 — Measurements of all 18 metal substructure. Metal substructures are given numbers from 1 to 18. Zones are given letters from A to H. Two photomicrographes were taken for each zone. Each photomicrograph was measured at 4 reference points. [file peerj-10-13280-s001.xlsx]

## Sheet: posit&neg
	Zone	A								B								C								D								E								F
		buccal								buccal								mesio-buccal								mesio-lingual								lingual								lingual
positive & negative	subdivision	A1-1	A1-2	A1-3	A1-4	A2-1	A2-2	A2-3	A2-4	B1-1	B1-2	B1-3	B1-4	B2-1	B2-2	B2-3	B2-4	C1-1	C1-2	C1-3	C1-4	C2-1	C2-2	C2-3	C2-4	D1-1	D1-2	D1-3	D1-4	D2-1	D2-2	D2-3	D2-4	E1-1	E1-2	E1-3	E1-4	E2-1	E2-2	E2-3	E2-4	F1-1	F1-2	F1-3	F1-4	F2-1	F2-2	F2-3	F2-4
	CN01	20	3	2	9	69	78	78	64	69	67	66	77	118	128	100	90	15	55	44	125	69	43	37	55	41	64	88	93	22	21	13	17	38	38	33	18	14	21	16	43	0	-3	-8	-10	47	57	62	108
	CN02	-53	-16	-16	-4	35	46	47	35	59	58	61	70	96	100	87	55	2	42	25	105	68	49	39	65	15	40	61	64	34	24	20	22	39	31	34	11	2	11	9	31	-1	0	1	0	44	59	74	111
	CN03	-20	-5	12	27	102	110	110	98	110	111	106	120	162	176	150	141	54	97	80	160	98	71	63	83	52	79	115	118	53	39	36	36	78	79	72	50	14	27	18	42	10	9	4	9	63	82	90	130
	CN04	-26	-2	5	13	66	82	83	66	80	78	76	88	137	148	119	106	64	99	77	160	80	63	56	72	45	70	107	109	40	31	37	37	51	54	50	28	-4	16	5	27	17	15	9	14	55	76	76	117
	CN05	-63	-23	-29	-20	49	52	56	40	49	50	44	58	102	113	83	67	45	87	60	44	48	23	19	35	35	54	95	113	-23	-2	-30	-27	20	23	14	5	-4	-6	-4	17	-4	-5	-11	-8	53	66	69	100
	CN06	-30	4	6	22	78	87	88	76	88	86	86	97	114	125	99	88	72	106	97	184	57	24	20	41	35	61	95	96	16	19	-17	-10	48	52	41	17	-14	-4	-10	12	-2	-5	-8	-12	53	66	68	118
	CN07	31	68	70	85	159	170	168	154	152	153	154	159	236	238	215	202	117	159	136	212	166	135	117	140	125	148	179	193	125	119	110	126	144	152	151	128	84	92	88	113	83	79	76	74	133	144	155	182
	CN08	-72	-39	-33	-26	42	53	46	35	42	40	42	54	95	107	79	70	18	44	24	108	71	44	35	50	35	66	87	96	16	13	10	11	70	65	61	44	1	16	2	22	9	6	4	2	41	62	69	109
	CN09	-62	-33	-27	-22	55	64	65	50	49	49	43	53	100	110	86	77	31	68	40	122	84	57	52	78	44	72	105	121	10	15	11	14	35	38	40	14	-12	-2	-7	9	0	-2	-2	-5	21	40	44	73
	CN10	11	46	46	63	116	130	129	112	117	121	125	134	163	170	146	138	64	109	101	168	171	129	123	139	111	137	167	172	109	102	90	95	134	136	134	118	54	71	68	87	85	78	79	78	63	86	98	136
	CN11	-38	-8	-6	0	56	60	59	49	31	37	33	45	119	134	104	92	10	52	30	108	50	22	19	36	6	36	66	76	26	37	43	46	48	50	45	24	4	17	11	30	-12	-14	-22	-23	51	65	68	103
	CN12	-62	-27	-28	-12	65	80	75	67	45	48	45	54	101	115	86	73	33	74	47	127	72	44	35	52	-6	19	50	68	3	3	-1	-1	47	51	46	15	-15	-4	-8	12	9	7	2	3	48	65	60	98
	CN13	-94	-64	-62	-45	15	24	22	7	24	27	30	41	74	87	63	52	-33	3	-14	66	66	36	30	54	-13	10	44	51	11	8	-4	4	22	30	23	0	-12	-1	-4	15	3	2	1	-4	29	59	58	103
	CN14	-79	-44	-47	#REF!	26	34	34	24	26	28	25	36	84	89	57	48	29	66	41	121	84	53	48	69	12	37	75	86	8	3	2	-2	42	46	40	19	-16	-7	-14	13	-21	-27	-30	-24	13	41	45	79
	CN15	17	45	42	50	141	149	145	132	141	142	132	138	248	253	225	216	129	161	134	222	162	134	133	160	115	143	181	198	108	108	114	121	111	111	113	95	58	79	69	88	75	71	69	67	112	126	130	162
	CN16	21	54	53	70	131	142	143	130	144	145	140	156	192	206	182	171	115	158	141	225	168	144	137	154	68	95	121	136	80	77	68	75	97	103	100	81	42	53	47	68	25	27	25	25	73	91	96	140
	CN17	133	177	178	207	208	228	225	210	197	207	208	215	234	233	216	209	196	239	215	300	132	111	102	133	84	105	135	150	93	85	72	79	123	125	124	100	51	52	54	72	69	63	55	53	139	144	157	176
	CN18	55	92	88	111	152	172	166	151	164	171	170	171	226	228	206	194	159	213	192	249	185	167	154	180	124	148	185	195	126	122	106	119	134	135	130	114	69	73	70	92	79	84	74	62	130	147	153	178
[truncated: 16 more columns]
